# Supplementary material for: Retinal Pigment Epithelium Remodeling in Mouse Models of Retinitis Pigmentosa
Source: MDPI journal article supplement (doi:10.3390/ijms22105381), 2021-05-20
Supplement: s1 [file s1]

The following are available online at <https://www.mdpi.com/article/10.3390/ijms22105381/s1>

Figure S1: Density of ZO-1-positive profiles in the RPE of different mouse models of RP. Single counts distribution

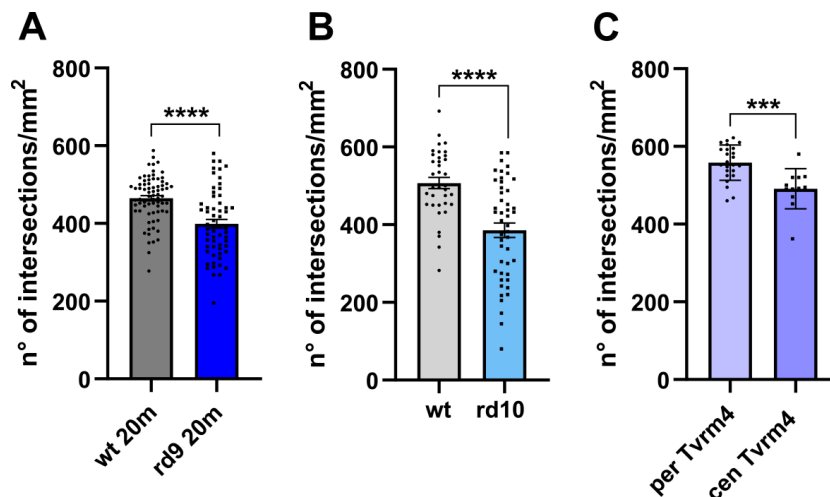

**Supplementary Figure S1.** Density of ZO-1 positive profiles in the RPE of the three different mouse models of RP. Single point representations: each dot represents a microscopic field of whole mount RPE used for counting. A. Comparison between 20 m old rd9 (n=61) and age-matched wt mice (n=74). Unpaired t test,  $p < 0.0001$ . B. Comparison between rd10 (n=48) and age-matched wt (n=36) (all 45-50 days old). Unpaired t test, \*\*\*  $p < 0.0001$ . C. Comparison between central (cen Tvrm4, n=12) and peripheral (per Tvrm4, n=24) zones of the RPE of Tvrm4 mice. Paired t test,  $p = 0.0003$ . Error bars represent  $\pm$ SEM

The following are available online at <https://www.mdpi.com/article/10.3390/ijms22105381/s1>

Figure S2: ZO-1-density distribution in control conditions for the three mouse strains under study

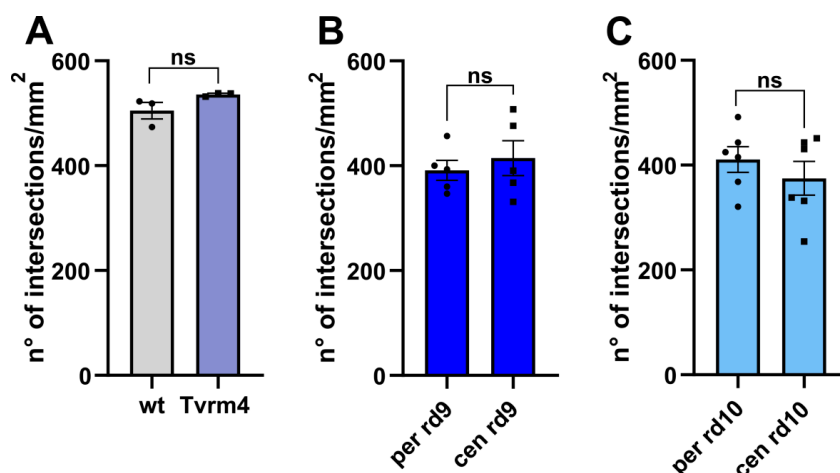

**Supplementary Figure S2.** A. Comparison between Tvrm4 (n=3) and age-matched wt (n=3). Unpaired t test,  $p = 0.1230$ . B. Comparison between central (cen rd9, n=5) and peripheral (per rd9, n=5) zones of the RPE of rd9 mice. Paired t test,  $p = 0.5101$ . C. Comparison between central (cen rd10, n=6) and peripheral (per rd10, n=6) zones of the RPE of rd10 mice. Paired t test,  $p = 0.3697$ . Error bars represent  $\pm$ SEM. ns: not significant.
